# Supplementary material
Source: publisher figshare collection journal article supplement (https://acs.figshare.com/ndownloader/files/4728022)
Supplement: Supplementary file 1 [file 4728022]

## Crystallgraphic data for 1Eu, [Eu2(fum)2(ox)(H2O)4].4H2O ##

data_1Eu
 
_audit_creation_method            SHELXL-97 
_chemical_name_systematic 
; 
 ? 
; 
_chemical_name_common             ? 
_chemical_melting_point           ? 
_chemical_formula_moiety          ? 
_chemical_formula_sum 
 'C10 H20 Eu2 O20' 
_chemical_formula_weight          764.18 
 
loop_ 
 _atom_type_symbol 
 _atom_type_description 
 _atom_type_scat_dispersion_real 
 _atom_type_scat_dispersion_imag 
 _atom_type_scat_source 
 'C'  'C'   0.0033   0.0016 
 'International Tables Vol C Tables 4.2.6.8 and 6.1.1.4' 
 'H'  'H'   0.0000   0.0000 
 'International Tables Vol C Tables 4.2.6.8 and 6.1.1.4' 
 'O'  'O'   0.0106   0.0060 
 'International Tables Vol C Tables 4.2.6.8 and 6.1.1.4' 
 'Eu'  'Eu'  -0.1578   3.6682 
 'International Tables Vol C Tables 4.2.6.8 and 6.1.1.4' 
 
_symmetry_cell_setting            'Orthorhombic' 
_symmetry_space_group_name_H-M    'F ddd' 
 
loop_ 
 _symmetry_equiv_pos_as_xyz 
 'x, y, z' 
 '-x+3/4, -y+3/4, z' 
 '-x+3/4, y, -z+3/4' 
 'x, -y+3/4, -z+3/4' 
 'x, y+1/2, z+1/2' 
 '-x+3/4, -y+5/4, z+1/2' 
 '-x+3/4, y+1/2, -z+5/4' 
 'x, -y+5/4, -z+5/4' 
 'x+1/2, y, z+1/2' 
 '-x+5/4, -y+3/4, z+1/2' 
 '-x+5/4, y, -z+5/4' 
 'x+1/2, -y+3/4, -z+5/4' 
 'x+1/2, y+1/2, z' 
 '-x+5/4, -y+5/4, z' 
 '-x+5/4, y+1/2, -z+3/4' 
 'x+1/2, -y+5/4, -z+3/4' 
 '-x, -y, -z' 
 'x-3/4, y-3/4, -z' 
 'x-3/4, -y, z-3/4' 
 '-x, y-3/4, z-3/4' 
 '-x, -y+1/2, -z+1/2' 
 'x-3/4, y-1/4, -z+1/2' 
 'x-3/4, -y+1/2, z-1/4' 
 '-x, y-1/4, z-1/4' 
 '-x+1/2, -y, -z+1/2' 
 'x-1/4, y-3/4, -z+1/2' 
 'x-1/4, -y, z-1/4' 
 '-x+1/2, y-3/4, z-1/4' 
 '-x+1/2, -y+1/2, -z' 
 'x-1/4, y-1/4, -z' 
 'x-1/4, -y+1/2, z-3/4' 
 '-x+1/2, y-1/4, z-3/4' 
 
_cell_length_a                    9.6976(2) 
_cell_length_b                    15.4428(4) 
_cell_length_c                    27.4205(6) 
_cell_angle_alpha                 90.00 
_cell_angle_beta                  90.00 
_cell_angle_gamma                 90.00 
_cell_volume                      4106.44(16) 
_cell_formula_units_Z             8 
_cell_measurement_temperature     293(2) 
_cell_measurement_reflns_used     7925
_cell_measurement_theta_min       3.395
_cell_measurement_theta_max       27.485
 
_exptl_crystal_description        'block' 
_exptl_crystal_colour             'colorless' 
_exptl_crystal_size_max           0.19
_exptl_crystal_size_mid           0.17 
_exptl_crystal_size_min           0.12 
_exptl_crystal_density_meas       ? 
_exptl_crystal_density_diffrn     2.472 
_exptl_crystal_density_method     'not measured' 
_exptl_crystal_F_000              2928 
_exptl_absorpt_coefficient_mu     6.152 
_exptl_absorpt_correction_type    'multi-scan' 
_exptl_absorpt_correction_T_min   0.332
_exptl_absorpt_correction_T_max   0.480
_exptl_absorpt_process_details
;
multi-scan from symmetry-related measurements 
 Sortav (Blessing 1995, 1997)
;
 
_exptl_special_details 
; 
 ? 
; 
 
_diffrn_ambient_temperature       293(2) 
_diffrn_radiation_wavelength      0.71073 
_diffrn_radiation_type            MoK\a 
_diffrn_radiation_source          'fine-focus sealed tube' 
_diffrn_radiation_monochromator   graphite 
_diffrn_measurement_device_type   'NONIUS KappaCCD Diffractometer' 
_diffrn_measurement_method        'CCD' 
_diffrn_detector_area_resol_mean  0.76 
_diffrn_standards_number          ? 
_diffrn_standards_interval_count  ? 
_diffrn_standards_interval_time   ? 
_diffrn_standards_decay_%         none 
_diffrn_reflns_number             15956 
_diffrn_reflns_av_R_equivalents   0.0749 
_diffrn_reflns_av_sigmaI/netI     0.0356 
_diffrn_reflns_limit_h_min        -12 
_diffrn_reflns_limit_h_max        12 
_diffrn_reflns_limit_k_min        -20 
_diffrn_reflns_limit_k_max        20 
_diffrn_reflns_limit_l_min        -35 
_diffrn_reflns_limit_l_max        35 
_diffrn_reflns_theta_min          4.46 
_diffrn_reflns_theta_max          27.49 
_reflns_number_total              1180 
_reflns_number_gt                 882 
_reflns_threshold_expression      >2sigma(I) 
 
_computing_data_collection        'KappaCCD (Nonius B. V., 1998)' 
_computing_cell_refinement        'HKL Scalepack (Otwinowski & Minor, 1997)' 
_computing_data_reduction
'HKL Denzo (Otwinowski & Minor, 1997) & maXus (Mackay et al., 1998)'
_computing_structure_solution     'SHELXS-97 (Sheldrick, 1997)' 
_computing_structure_refinement   'SHELXL-97 (Sheldrick, 1997)' 
_computing_molecular_graphics     'Bruker SHELXTL V5.1 (Sheldrick, 1998)' 
_computing_publication_material   'SHELXL-97 (Sheldrick, 1997)' 

_publ_section_references
;
collect:
"Collect" data collection software, Nonius B.V., Delft, The Netherlands, 1998.

HKL Scalepack & HKL Denzo:
Z. Otwinowski and W. Minor, " Processing of X-ray Diffraction Data Collected
in Oscillation Mode ", Methods in Enzymology, Volume 276: Macromolecular
Crystallography, part A, p.307-326, 1997,C.W. Carter, Jr. & R.M. Sweet,
Eds., Academic Press, London.

absorption correction:
R.H. Blessing (1995) Acta Cryst. A51, 33-37.
R.H. Blessing (1997) J.Appl. Cryst. 30, 421-426.

maXus: 
S.Mackay, C.J.Gilmore, C.Edwards, M. Tremayne, N. Stuart, K.Shankland
"maXus: a computer program for the solution and refinement of crystal
structures from diffraction data", University of Glasgow, Scotland, UK,
Nonius BV, Delft, The Netherlands and MacScience Co. Ltd., Yokohama,
Japan (1998).

Sheldrick, G. M. (1998). SHELXTL Version 5.1. Bruker Analytical X-ray
Instruments Inc., Madison, Wisconsin, USA.

Sheldrick, G. M. (1997). SHELX-97. PC Version. University of Goettingen,
Germany.
;
 
_refine_special_details 
; 
 H atoms of lattice water, O5, were not included in structure refinement.

 Refinement of F^2^ against ALL reflections.  The weighted R-factor wR and
 goodness of fit S are based on F^2^, conventional R-factors R are based 
 on F, with F set to zero for negative F^2^. The threshold expression of 
 F^2^ > 2sigma(F^2^) is used only for calculating R-factors(gt) etc. and is 
 not relevant to the choice of reflections for refinement.  R-factors based 
 on F^2^ are statistically about twice as large as those based on F, and R- 
 factors based on ALL data will be even larger. 
; 
 
_refine_ls_structure_factor_coef  Fsqd  
_refine_ls_matrix_type            full 
_refine_ls_weighting_scheme       calc  
_refine_ls_weighting_details 
 'calc w=1/[\s^2^(Fo^2^)+(0.0399P)^2^+0.0000P] where P=(Fo^2^+2Fc^2^)/3' 
_atom_sites_solution_primary      direct 
_atom_sites_solution_secondary    difmap 
_atom_sites_solution_hydrogens    geom 
_refine_ls_hydrogen_treatment     'constraint' 
_refine_ls_extinction_method      SHELXL 
_refine_ls_extinction_coef        0.00039(4) 
_refine_ls_extinction_expression 
 'Fc^*^=kFc[1+0.001xFc^2^\l^3^/sin(2\q)]^-1/4^' 
_refine_ls_number_reflns          1180 
_refine_ls_number_parameters      82 
_refine_ls_number_restraints      3 
_refine_ls_R_factor_all           0.0455 
_refine_ls_R_factor_gt            0.0275 
_refine_ls_wR_factor_ref          0.0641 
_refine_ls_wR_factor_gt           0.0607 
_refine_ls_goodness_of_fit_ref    0.974 
_refine_ls_restrained_S_all       0.973 
_refine_ls_shift/su_max           0.001 
_refine_ls_shift/su_mean          0.000 
 
loop_ 
 _atom_site_label 
 _atom_site_type_symbol 
 _atom_site_fract_x 
 _atom_site_fract_y 
 _atom_site_fract_z 
 _atom_site_U_iso_or_equiv 
 _atom_site_adp_type 
 _atom_site_occupancy 
 _atom_site_symmetry_multiplicity 
 _atom_site_calc_flag 
 _atom_site_refinement_flags 
 _atom_site_disorder_assembly 
 _atom_site_disorder_group 
Eu1 Eu 0.6250 0.1250 0.509490(9) 0.02557(16) Uani 1 2 d S . . 
O1 O 0.3709(3) 0.0214(2) 0.51645(10) 0.0334(7) Uani 1 1 d . . . 
O2 O 0.3868(3) 0.1570(2) 0.53787(12) 0.0361(8) Uani 1 1 d . . . 
O3 O 0.6146(3) 0.0388(2) 0.58460(9) 0.0286(7) Uani 1 1 d . . . 
O4 O 0.4749(4) 0.1268(2) 0.43634(11) 0.0348(7) Uani 1 1 d D . . 
O5 O 0.5546(6) 0.2023(4) 0.3483(2) 0.108(2) Uani 1 1 d . . . 
C1 C 0.3156(5) 0.0908(3) 0.52923(16) 0.0265(9) Uani 1 1 d . . . 
C2 C 0.1629(5) 0.0912(3) 0.5317(2) 0.0422(12) Uani 1 1 d . . . 
H2 H 0.1187 0.0378 0.5333 0.051 Uiso 1 1 calc R . . 
C3 C 0.6250 0.0754(4) 0.6250 0.0231(12) Uani 1 2 d S . . 
H41 H 0.502(6) 0.157(3) 0.4086(13) 0.072(15) Uiso 1 1 d D . . 
H42 H 0.449(6) 0.0707(17) 0.4260(17) 0.072(15) Uiso 1 1 d D . . 
 
loop_ 
 _atom_site_aniso_label 
 _atom_site_aniso_U_11 
 _atom_site_aniso_U_22 
 _atom_site_aniso_U_33 
 _atom_site_aniso_U_23 
 _atom_site_aniso_U_13 
 _atom_site_aniso_U_12 
Eu1 0.0376(2) 0.0205(2) 0.01866(19) 0.000 0.000 0.00715(16) 
O1 0.0432(18) 0.0256(18) 0.0314(17) -0.0051(13) 0.0007(15) 0.0060(16) 
O2 0.0405(19) 0.0247(17) 0.0431(18) -0.0015(14) -0.0013(17) -0.0062(16) 
O3 0.0462(19) 0.0212(16) 0.0185(14) -0.0003(11) -0.0013(14) -0.0023(15) 
O4 0.049(2) 0.0298(18) 0.0255(15) 0.0033(15) -0.0036(14) -0.0068(18) 
O5 0.098(4) 0.119(5) 0.107(4) 0.062(4) 0.013(4) -0.005(4) 
C1 0.027(2) 0.028(2) 0.025(2) 0.0022(19) 0.0013(19) 0.004(2) 
C2 0.041(3) 0.028(3) 0.057(3) -0.001(3) 0.003(3) -0.002(2) 
C3 0.026(3) 0.021(3) 0.022(3) 0.000 -0.003(3) 0.000 
 
_geom_special_details 
; 
 All esds (except the esd in the dihedral angle between two l.s. planes) 
 are estimated using the full covariance matrix.  The cell esds are taken 
 into account individually in the estimation of esds in distances, angles 
 and torsion angles; correlations between esds in cell parameters are only 
 used when they are defined by crystal symmetry.  An approximate (isotropic) 
 treatment of cell esds is used for estimating esds involving l.s. planes. 
; 
 
loop_ 
 _geom_bond_atom_site_label_1 
 _geom_bond_atom_site_label_2 
 _geom_bond_distance 
 _geom_bond_site_symmetry_2 
 _geom_bond_publ_flag 
Eu1 O1 2.371(3) 17_656 ? 
Eu1 O1 2.371(3) 18_666 ? 
Eu1 O3 2.454(3) . ? 
Eu1 O3 2.454(3) 14_545 ? 
Eu1 O4 2.478(3) 14_545 ? 
Eu1 O4 2.478(3) . ? 
Eu1 O2 2.487(3) 14_545 ? 
Eu1 O2 2.487(3) . ? 
Eu1 O1 2.944(3) 14_545 ? 
Eu1 O1 2.944(3) . ? 
Eu1 C1 3.094(5) 14_545 ? 
Eu1 C1 3.094(5) . ? 
O1 C1 1.248(5) . ? 
O1 Eu1 2.371(3) 17_656 ? 
O2 C1 1.255(6) . ? 
O3 C3 1.247(4) . ? 
O4 H41 0.932(19) . ? 
O4 H42 0.947(19) . ? 
C1 C2 1.483(7) . ? 
C2 C2 1.276(10) 14_445 ? 
C2 H2 0.9300 . ? 
C3 O3 1.247(4) 11 ? 
C3 C3 1.532(12) 14_545 ? 
C3 Eu1 3.2587(14) 11 ? 
 
loop_ 
 _geom_angle_atom_site_label_1 
 _geom_angle_atom_site_label_2 
 _geom_angle_atom_site_label_3 
 _geom_angle 
 _geom_angle_site_symmetry_1 
 _geom_angle_site_symmetry_3 
 _geom_angle_publ_flag 
O1 Eu1 O1 145.08(14) 17_656 18_666 ? 
O1 Eu1 O3 74.66(9) 17_656 . ? 
O1 Eu1 O3 140.20(10) 18_666 . ? 
O1 Eu1 O3 140.20(10) 17_656 14_545 ? 
O1 Eu1 O3 74.66(9) 18_666 14_545 ? 
O3 Eu1 O3 65.88(14) . 14_545 ? 
O1 Eu1 O4 74.73(11) 17_656 14_545 ? 
O1 Eu1 O4 77.16(11) 18_666 14_545 ? 
O3 Eu1 O4 134.22(11) . 14_545 ? 
O3 Eu1 O4 131.39(11) 14_545 14_545 ? 
O1 Eu1 O4 77.16(11) 17_656 . ? 
O1 Eu1 O4 74.73(11) 18_666 . ? 
O3 Eu1 O4 131.39(11) . . ? 
O3 Eu1 O4 134.22(11) 14_545 . ? 
O4 Eu1 O4 71.93(16) 14_545 . ? 
O1 Eu1 O2 83.62(11) 17_656 14_545 ? 
O1 Eu1 O2 107.39(11) 18_666 14_545 ? 
O3 Eu1 O2 70.61(10) . 14_545 ? 
O3 Eu1 O2 78.86(10) 14_545 14_545 ? 
O4 Eu1 O2 72.88(11) 14_545 14_545 ? 
O4 Eu1 O2 143.21(11) . 14_545 ? 
O1 Eu1 O2 107.39(11) 17_656 . ? 
O1 Eu1 O2 83.62(11) 18_666 . ? 
O3 Eu1 O2 78.86(10) . . ? 
O3 Eu1 O2 70.61(10) 14_545 . ? 
O4 Eu1 O2 143.21(11) 14_545 . ? 
O4 Eu1 O2 72.88(11) . . ? 
O2 Eu1 O2 143.53(15) 14_545 . ? 
O1 Eu1 O1 121.57(12) 17_656 14_545 ? 
O1 Eu1 O1 61.02(12) 18_666 14_545 ? 
O3 Eu1 O1 105.94(9) . 14_545 ? 
O3 Eu1 O1 67.45(9) 14_545 14_545 ? 
O4 Eu1 O1 64.35(10) 14_545 14_545 ? 
O4 Eu1 O1 122.54(10) . 14_545 ? 
O2 Eu1 O1 46.37(9) 14_545 14_545 ? 
O2 Eu1 O1 130.49(10) . 14_545 ? 
O1 Eu1 O1 61.02(12) 17_656 . ? 
O1 Eu1 O1 121.57(12) 18_666 . ? 
O3 Eu1 O1 67.45(9) . . ? 
O3 Eu1 O1 105.94(9) 14_545 . ? 
O4 Eu1 O1 122.54(10) 14_545 . ? 
O4 Eu1 O1 64.35(10) . . ? 
O2 Eu1 O1 130.49(10) 14_545 . ? 
O2 Eu1 O1 46.37(9) . . ? 
O1 Eu1 O1 172.56(11) 14_545 . ? 
O1 Eu1 C1 101.47(12) 17_656 14_545 ? 
O1 Eu1 C1 84.62(13) 18_666 14_545 ? 
O3 Eu1 C1 89.17(11) . 14_545 ? 
O3 Eu1 C1 73.78(11) 14_545 14_545 ? 
O4 Eu1 C1 64.80(11) 14_545 14_545 ? 
O4 Eu1 C1 135.17(12) . 14_545 ? 
O2 Eu1 C1 22.84(11) 14_545 14_545 ? 
O2 Eu1 C1 144.30(11) . 14_545 ? 
O1 Eu1 C1 23.70(10) 14_545 14_545 ? 
O1 Eu1 C1 153.25(10) . 14_545 ? 
O1 Eu1 C1 84.62(13) 17_656 . ? 
O1 Eu1 C1 101.47(12) 18_666 . ? 
O3 Eu1 C1 73.78(11) . . ? 
O3 Eu1 C1 89.17(11) 14_545 . ? 
O4 Eu1 C1 135.17(12) 14_545 . ? 
O4 Eu1 C1 64.80(11) . . ? 
O2 Eu1 C1 144.30(11) 14_545 . ? 
O2 Eu1 C1 22.84(11) . . ? 
O1 Eu1 C1 153.25(10) 14_545 . ? 
O1 Eu1 C1 23.70(10) . . ? 
C1 Eu1 C1 159.84(16) 14_545 . ? 
C1 O1 Eu1 155.5(3) . 17_656 ? 
C1 O1 Eu1 84.9(3) . . ? 
Eu1 O1 Eu1 118.98(12) 17_656 . ? 
C1 O2 Eu1 106.9(3) . . ? 
C3 O3 Eu1 119.8(3) . . ? 
Eu1 O4 H41 120(3) . . ? 
Eu1 O4 H42 113(3) . . ? 
H41 O4 H42 107(3) . . ? 
O1 C1 O2 121.0(4) . . ? 
O1 C1 C2 116.4(5) . . ? 
O2 C1 C2 122.5(5) . . ? 
O1 C1 Eu1 71.4(3) . . ? 
O2 C1 Eu1 50.3(2) . . ? 
C2 C1 Eu1 167.4(4) . . ? 
C2 C2 C1 125.3(7) 14_445 . ? 
C2 C2 H2 117.3 14_445 . ? 
C1 C2 H2 117.3 . . ? 
O3 C3 O3 126.2(6) . 11 ? 
O3 C3 C3 116.9(3) . 14_545 ? 
O3 C3 C3 116.9(3) 11 14_545 ? 
O3 C3 Eu1 40.8(2) . . ? 
O3 C3 Eu1 165.8(4) 11 . ? 
C3 C3 Eu1 76.40(10) 14_545 . ? 
O3 C3 Eu1 165.8(4) . 11 ? 
O3 C3 Eu1 40.8(2) 11 11 ? 
C3 C3 Eu1 76.40(10) 14_545 11 ? 
Eu1 C3 Eu1 152.8(2) . 11 ? 
 
loop_ 
 _geom_hbond_atom_site_label_D 
 _geom_hbond_atom_site_label_H 
 _geom_hbond_atom_site_label_A 
 _geom_hbond_distance_DH 
 _geom_hbond_distance_HA 
 _geom_hbond_distance_DA 
 _geom_hbond_angle_DHA 
 _geom_hbond_site_symmetry_A 
O4 H41 O5  0.932(19) 1.87(2) 2.790(6) 171(5) . 
O4 H42 O3  0.947(19) 1.82(2) 2.762(5) 171(5) 17_656 
 
_diffrn_measured_fraction_theta_max    0.997 
_diffrn_reflns_theta_full              27.49 
_diffrn_measured_fraction_theta_full   0.997 
_refine_diff_density_max    0.777 
_refine_diff_density_min   -1.902 
_refine_diff_density_rms    0.157 

## End of 1Eu ##

## Crystallgraphic data for 2Tb, [Tb2(fum)2(ox)(H2O)4].4H2O ##
 
data_2Tb 
 
_audit_creation_method            SHELXL-97 
_chemical_name_systematic 
; 
 ? 
; 
_chemical_name_common             ? 
_chemical_melting_point           ? 
_chemical_formula_moiety          ? 
_chemical_formula_sum 
 'C10 H20 O20 Tb2' 
_chemical_formula_weight          778.10 
 
loop_ 
 _atom_type_symbol 
 _atom_type_description 
 _atom_type_scat_dispersion_real 
 _atom_type_scat_dispersion_imag 
 _atom_type_scat_source 
 'C'  'C'   0.0033   0.0016 
 'International Tables Vol C Tables 4.2.6.8 and 6.1.1.4' 
 'H'  'H'   0.0000   0.0000 
 'International Tables Vol C Tables 4.2.6.8 and 6.1.1.4' 
 'O'  'O'   0.0106   0.0060 
 'International Tables Vol C Tables 4.2.6.8 and 6.1.1.4' 
 'Tb'  'Tb'  -0.1723   4.1537 
 'International Tables Vol C Tables 4.2.6.8 and 6.1.1.4' 
 
_symmetry_cell_setting            'Orthorhombic' 
_symmetry_space_group_name_H-M    'F ddd' 
 
loop_ 
 _symmetry_equiv_pos_as_xyz 
 'x, y, z' 
 '-x+3/4, -y+3/4, z' 
 '-x+3/4, y, -z+3/4' 
 'x, -y+3/4, -z+3/4' 
 'x, y+1/2, z+1/2' 
 '-x+3/4, -y+5/4, z+1/2' 
 '-x+3/4, y+1/2, -z+5/4' 
 'x, -y+5/4, -z+5/4' 
 'x+1/2, y, z+1/2' 
 '-x+5/4, -y+3/4, z+1/2' 
 '-x+5/4, y, -z+5/4' 
 'x+1/2, -y+3/4, -z+5/4' 
 'x+1/2, y+1/2, z' 
 '-x+5/4, -y+5/4, z' 
 '-x+5/4, y+1/2, -z+3/4' 
 'x+1/2, -y+5/4, -z+3/4' 
 '-x, -y, -z' 
 'x-3/4, y-3/4, -z' 
 'x-3/4, -y, z-3/4' 
 '-x, y-3/4, z-3/4' 
 '-x, -y+1/2, -z+1/2' 
 'x-3/4, y-1/4, -z+1/2' 
 'x-3/4, -y+1/2, z-1/4' 
 '-x, y-1/4, z-1/4' 
 '-x+1/2, -y, -z+1/2' 
 'x-1/4, y-3/4, -z+1/2' 
 'x-1/4, -y, z-1/4' 
 '-x+1/2, y-3/4, z-1/4' 
 '-x+1/2, -y+1/2, -z' 
 'x-1/4, y-1/4, -z' 
 'x-1/4, -y+1/2, z-3/4' 
 '-x+1/2, y-1/4, z-3/4' 
 
_cell_length_a                    9.6648(2) 
_cell_length_b                    15.4844(3) 
_cell_length_c                    27.1305(6) 
_cell_angle_alpha                 90.00 
_cell_angle_beta                  90.00 
_cell_angle_gamma                 90.00 
_cell_volume                      4060.18(15) 
_cell_formula_units_Z             8 
_cell_measurement_temperature     293(2) 
_cell_measurement_reflns_used     10154
_cell_measurement_theta_min       3.395
_cell_measurement_theta_max       27.485
 
_exptl_crystal_description        'block' 
_exptl_crystal_colour             'colorless' 
_exptl_crystal_size_max           0.28
_exptl_crystal_size_mid           0.27 
_exptl_crystal_size_min           0.25 
_exptl_crystal_density_meas       ? 
_exptl_crystal_density_diffrn     2.546 
_exptl_crystal_density_method     'not measured' 
_exptl_crystal_F_000              2960 
_exptl_absorpt_coefficient_mu     7.010 
_exptl_absorpt_correction_type    'multi-scan' 
_exptl_absorpt_correction_T_min   0.119
_exptl_absorpt_correction_T_max   0.207
_exptl_absorpt_process_details
;
multi-scan from symmetry-related measurements 
 Sortav (Blessing 1995, 1997)
;
 
_exptl_special_details 
; 
 ? 
; 
 
_diffrn_ambient_temperature       293(2) 
_diffrn_radiation_wavelength      0.71073 
_diffrn_radiation_type            MoK\a 
_diffrn_radiation_source          'fine-focus sealed tube' 
_diffrn_radiation_monochromator   graphite 
_diffrn_measurement_device_type   'NONIUS KappaCCD Diffractometer' 
_diffrn_measurement_method        'CCD' 
_diffrn_detector_area_resol_mean  0.76 
_diffrn_standards_number          ? 
_diffrn_standards_interval_count  ? 
_diffrn_standards_interval_time   ? 
_diffrn_standards_decay_%         none 
_diffrn_reflns_number             17548 
_diffrn_reflns_av_R_equivalents   0.0734 
_diffrn_reflns_av_sigmaI/netI     0.0256 
_diffrn_reflns_limit_h_min        -12 
_diffrn_reflns_limit_h_max        12 
_diffrn_reflns_limit_k_min        -19 
_diffrn_reflns_limit_k_max        20 
_diffrn_reflns_limit_l_min        -35 
_diffrn_reflns_limit_l_max        35 
_diffrn_reflns_theta_min          4.48 
_diffrn_reflns_theta_max          27.47 
_reflns_number_total              1167 
_reflns_number_gt                 952 
_reflns_threshold_expression      >2sigma(I) 
 
_computing_data_collection        'KappaCCD (Nonius B. V., 1998)' 
_computing_cell_refinement        'HKL Scalepack (Otwinowski & Minor, 1997)' 
_computing_data_reduction
'HKL Denzo (Otwinowski & Minor, 1997) & maXus (Mackay et al., 1998)'
_computing_structure_solution     'SHELXS-97 (Sheldrick, 1997)' 
_computing_structure_refinement   'SHELXL-97 (Sheldrick, 1997)' 
_computing_molecular_graphics     'Bruker SHELXTL V5.1 (Sheldrick, 1998)' 
_computing_publication_material   'SHELXL-97 (Sheldrick, 1997)' 

_publ_section_references
;
collect:
"Collect" data collection software, Nonius B.V., Delft, The Netherlands, 1998.

HKL Scalepack & HKL Denzo:
Z. Otwinowski and W. Minor, " Processing of X-ray Diffraction Data Collected
in Oscillation Mode ", Methods in Enzymology, Volume 276: Macromolecular
Crystallography, part A, p.307-326, 1997,C.W. Carter, Jr. & R.M. Sweet,
Eds., Academic Press, London.

absorption correction:
R.H. Blessing (1995) Acta Cryst. A51, 33-37.
R.H. Blessing (1997) J.Appl. Cryst. 30, 421-426.

maXus: 
S.Mackay, C.J.Gilmore, C.Edwards, M. Tremayne, N. Stuart, K.Shankland
"maXus: a computer program for the solution and refinement of crystal
structures from diffraction data", University of Glasgow, Scotland, UK,
Nonius BV, Delft, The Netherlands and MacScience Co. Ltd., Yokohama,
Japan (1998).

Sheldrick, G. M. (1998). SHELXTL Version 5.1. Bruker Analytical X-ray
Instruments Inc., Madison, Wisconsin, USA.

Sheldrick, G. M. (1997). SHELX-97. PC Version. University of Goettingen,
Germany.
;
 
_refine_special_details 
; 
 H atoms of lattice water, O5, were not included in structure refinement.

 Refinement of F^2^ against ALL reflections.  The weighted R-factor wR and
 goodness of fit S are based on F^2^, conventional R-factors R are based 
 on F, with F set to zero for negative F^2^. The threshold expression of 
 F^2^ > 2sigma(F^2^) is used only for calculating R-factors(gt) etc. and is 
 not relevant to the choice of reflections for refinement.  R-factors based 
 on F^2^ are statistically about twice as large as those based on F, and R- 
 factors based on ALL data will be even larger. 
; 
 
_refine_ls_structure_factor_coef  Fsqd  
_refine_ls_matrix_type            full 
_refine_ls_weighting_scheme       calc  
_refine_ls_weighting_details 
 'calc w=1/[\s^2^(Fo^2^)+(0.0365P)^2^+1.0348P] where P=(Fo^2^+2Fc^2^)/3' 
_atom_sites_solution_primary      direct 
_atom_sites_solution_secondary    difmap 
_atom_sites_solution_hydrogens    geom 
_refine_ls_hydrogen_treatment     'constraint' 
_refine_ls_extinction_method      SHELXL 
_refine_ls_extinction_coef        0.00125(6) 
_refine_ls_extinction_expression 
 'Fc^*^=kFc[1+0.001xFc^2^\l^3^/sin(2\q)]^-1/4^' 
_refine_ls_number_reflns          1167 
_refine_ls_number_parameters      82 
_refine_ls_number_restraints      3 
_refine_ls_R_factor_all           0.0294 
_refine_ls_R_factor_gt            0.0212 
_refine_ls_wR_factor_ref          0.0563 
_refine_ls_wR_factor_gt           0.0542 
_refine_ls_goodness_of_fit_ref    1.034 
_refine_ls_restrained_S_all       1.035 
_refine_ls_shift/su_max           0.001 
_refine_ls_shift/su_mean          0.000 
 
loop_ 
 _atom_site_label 
 _atom_site_type_symbol 
 _atom_site_fract_x 
 _atom_site_fract_y 
 _atom_site_fract_z 
 _atom_site_U_iso_or_equiv 
 _atom_site_adp_type 
 _atom_site_occupancy 
 _atom_site_symmetry_multiplicity 
 _atom_site_calc_flag 
 _atom_site_refinement_flags 
 _atom_site_disorder_assembly 
 _atom_site_disorder_group 
Tb1 Tb 0.6250 0.1250 0.509301(7) 0.02623(14) Uani 1 2 d S . . 
O1 O 0.3676(3) 0.01829(15) 0.51672(9) 0.0339(6) Uani 1 1 d . . . 
O2 O 0.3884(3) 0.15385(17) 0.53795(10) 0.0356(6) Uani 1 1 d . . . 
O3 O 0.6153(2) 0.03892(15) 0.58409(8) 0.0280(5) Uani 1 1 d . . . 
O4 O 0.4750(3) 0.12545(15) 0.43621(9) 0.0353(6) Uani 1 1 d D . . 
O5 O 0.5545(5) 0.2017(3) 0.34718(18) 0.0986(13) Uani 1 1 d . . . 
C1 C 0.3152(4) 0.0882(2) 0.52904(12) 0.0262(7) Uani 1 1 d . . . 
C2 C 0.1610(4) 0.0896(3) 0.53206(17) 0.0410(9) Uani 1 1 d . . . 
H2 H 0.1142 0.0372 0.5340 0.049 Uiso 1 1 calc R . . 
C3 C 0.6250 0.0751(3) 0.6250 0.0231(9) Uani 1 2 d S . . 
H41 H 0.494(5) 0.158(2) 0.4079(11) 0.072(11) Uiso 1 1 d D . . 
H42 H 0.434(5) 0.0745(18) 0.4243(14) 0.072(11) Uiso 1 1 d D . . 
 
loop_ 
 _atom_site_aniso_label 
 _atom_site_aniso_U_11 
 _atom_site_aniso_U_22 
 _atom_site_aniso_U_33 
 _atom_site_aniso_U_23 
 _atom_site_aniso_U_13 
 _atom_site_aniso_U_12 
Tb1 0.03367(19) 0.02423(17) 0.02079(17) 0.000 0.000 0.00719(9) 
O1 0.0414(16) 0.0282(13) 0.0321(13) -0.0036(10) 0.0010(11) 0.0065(11) 
O2 0.0346(15) 0.0302(13) 0.0419(14) -0.0025(12) 0.0006(12) -0.0036(11) 
O3 0.0417(15) 0.0216(11) 0.0207(11) -0.0016(9) -0.0027(10) -0.0023(10) 
O4 0.0437(16) 0.0326(13) 0.0297(13) 0.0025(10) -0.0035(12) -0.0063(12) 
O5 0.096(3) 0.097(3) 0.103(3) 0.044(3) 0.013(3) -0.004(3) 
C1 0.0256(17) 0.0273(17) 0.0256(17) -0.0007(14) 0.0014(14) 0.0019(14) 
C2 0.034(2) 0.034(2) 0.055(3) -0.0022(19) 0.0058(19) -0.0010(16) 
C3 0.022(2) 0.023(2) 0.025(2) 0.000 0.000(2) 0.000 
 
_geom_special_details 
; 
 All esds (except the esd in the dihedral angle between two l.s. planes) 
 are estimated using the full covariance matrix.  The cell esds are taken 
 into account individually in the estimation of esds in distances, angles 
 and torsion angles; correlations between esds in cell parameters are only 
 used when they are defined by crystal symmetry.  An approximate (isotropic) 
 treatment of cell esds is used for estimating esds involving l.s. planes. 
; 
 
loop_ 
 _geom_bond_atom_site_label_1 
 _geom_bond_atom_site_label_2 
 _geom_bond_distance 
 _geom_bond_site_symmetry_2 
 _geom_bond_publ_flag 
Tb1 O1 2.329(2) 17_656 ? 
Tb1 O1 2.329(2) 18_666 ? 
Tb1 O3 2.430(2) . ? 
Tb1 O3 2.430(2) 14_545 ? 
Tb1 O2 2.456(3) 14_545 ? 
Tb1 O2 2.456(3) . ? 
Tb1 O4 2.456(3) 14_545 ? 
Tb1 O4 2.456(3) . ? 
O1 C1 1.241(4) . ? 
O1 Tb1 2.329(2) 17_656 ? 
O2 C1 1.262(4) . ? 
O3 C3 1.247(3) . ? 
O4 H41 0.936(19) . ? 
O4 H42 0.940(19) . ? 
C1 C2 1.493(5) . ? 
C2 C2 1.298(8) 14_445 ? 
C2 H2 0.9300 . ? 
C3 O3 1.247(3) 11 ? 
C3 C3 1.545(9) 14_545 ? 
 
loop_ 
 _geom_angle_atom_site_label_1 
 _geom_angle_atom_site_label_2 
 _geom_angle_atom_site_label_3 
 _geom_angle 
 _geom_angle_site_symmetry_1 
 _geom_angle_site_symmetry_3 
 _geom_angle_publ_flag 
O1 Tb1 O1 144.72(12) 17_656 18_666 ? 
O1 Tb1 O3 74.44(8) 17_656 . ? 
O1 Tb1 O3 140.76(8) 18_666 . ? 
O1 Tb1 O3 140.76(8) 17_656 14_545 ? 
O1 Tb1 O3 74.44(8) 18_666 14_545 ? 
O3 Tb1 O3 66.73(11) . 14_545 ? 
O1 Tb1 O2 83.92(9) 17_656 14_545 ? 
O1 Tb1 O2 107.32(9) 18_666 14_545 ? 
O3 Tb1 O2 70.83(8) . 14_545 ? 
O3 Tb1 O2 78.45(8) 14_545 14_545 ? 
O1 Tb1 O2 107.32(9) 17_656 . ? 
O1 Tb1 O2 83.92(9) 18_666 . ? 
O3 Tb1 O2 78.45(8) . . ? 
O3 Tb1 O2 70.83(8) 14_545 . ? 
O2 Tb1 O2 143.11(13) 14_545 . ? 
O1 Tb1 O4 74.61(8) 17_656 14_545 ? 
O1 Tb1 O4 77.07(8) 18_666 14_545 ? 
O3 Tb1 O4 134.05(8) . 14_545 ? 
O3 Tb1 O4 130.77(8) 14_545 14_545 ? 
O2 Tb1 O4 72.87(9) 14_545 14_545 ? 
O2 Tb1 O4 143.65(9) . 14_545 ? 
O1 Tb1 O4 77.07(8) 17_656 . ? 
O1 Tb1 O4 74.61(8) 18_666 . ? 
O3 Tb1 O4 130.77(8) . . ? 
O3 Tb1 O4 134.05(8) 14_545 . ? 
O2 Tb1 O4 143.65(9) 14_545 . ? 
O2 Tb1 O4 72.87(9) . . ? 
O4 Tb1 O4 72.35(13) 14_545 . ? 
C1 O1 Tb1 157.7(2) . 17_656 ? 
C1 O2 Tb1 108.3(2) . . ? 
C3 O3 Tb1 119.6(2) . . ? 
Tb1 O4 H41 123(3) . . ? 
Tb1 O4 H42 122(3) . . ? 
H41 O4 H42 105(3) . . ? 
O1 C1 O2 121.7(3) . . ? 
O1 C1 C2 115.8(3) . . ? 
O2 C1 C2 122.5(3) . . ? 
C2 C2 C1 123.2(5) 14_445 . ? 
C2 C2 H2 118.4 14_445 . ? 
C1 C2 H2 118.4 . . ? 
O3 C3 O3 126.6(4) . 11 ? 
O3 C3 C3 116.7(2) . 14_545 ? 
O3 C3 C3 116.7(2) 11 14_545 ? 
 
loop_ 
 _geom_hbond_atom_site_label_D 
 _geom_hbond_atom_site_label_H 
 _geom_hbond_atom_site_label_A 
 _geom_hbond_distance_DH 
 _geom_hbond_distance_HA 
 _geom_hbond_distance_DA 
 _geom_hbond_angle_DHA 
 _geom_hbond_site_symmetry_A 
O4 H41 O5  0.936(19) 1.87(2) 2.796(5) 168(4) . 
O4 H42 O3  0.940(19) 1.83(2) 2.746(3) 163(4) 17_656 
 
_diffrn_measured_fraction_theta_max    0.997 
_diffrn_reflns_theta_full              27.47 
_diffrn_measured_fraction_theta_full   0.997 
_refine_diff_density_max    0.966 
_refine_diff_density_min   -0.899 
_refine_diff_density_rms    0.124 


## End of 2Tb ##
